# Supplementary material for: A general strategy to stabilize 1T-MoS2 using MXene heterostructures and unlock its hydrogen evolution reaction capabilities
Source: Royal Society of Chemistry journal article supplement (doi:10.1039/d3cp03558a), 2023-01-01
Supplement: d3cp03558a1.pdf [file d3cp03558a1.pdf]

## A General Strategy to Stabilize the 1T-MoS<sub>2</sub> by Using MXene Heterostructures and Unlock Its Hydrogen Evolution Reaction Capabilities

Yumiao Tian<sup>1</sup>, Xiaochun Liu<sup>1</sup>, Pengfei Hou<sup>1</sup>, Yu Xie<sup>1</sup>, Fei Du<sup>1</sup>, Gang Chen<sup>1</sup>, Aleksandra Vojvodic<sup>2</sup>, and Xing Meng<sup>1, 2, 3</sup>

\*

<sup>1</sup> Key Laboratory of Physics and Technology for Advanced Batteries (Ministry of Education), College of Physics, Jilin University, Changchun 130012, P. R. China

<sup>2</sup> Department of Chemical and Biomolecular Engineering, University of Pennsylvania, Philadelphia, Pennsylvania 19104, United States of America

<sup>3</sup> Key Laboratory of Symbolic Computation and Knowledge Engineering of Ministry of Education, Jilin University, Changchun 130012, P. R. China

\* Authors to whom any correspondence should be addressed.

E-mail: mengxing@jlu.edu.cn (Xing Meng)

**Table S1.** The lattice constant of the heterostructure

|                    | 1T-MoS <sub>2</sub> -          | 2H-MoS <sub>2</sub> -          | 1T-MoS <sub>2</sub> -           | 2H-MoS <sub>2</sub> -           | 1T-MoS <sub>2</sub> -          | 2H-MoS <sub>2</sub> -          | 1T-MoS <sub>2</sub> -           | 2H-MoS <sub>2</sub> -           |
|--------------------|--------------------------------|--------------------------------|---------------------------------|---------------------------------|--------------------------------|--------------------------------|---------------------------------|---------------------------------|
|                    | V <sub>2</sub> CO <sub>2</sub> | V <sub>2</sub> CO <sub>2</sub> | Mo <sub>2</sub> CO <sub>2</sub> | Mo <sub>2</sub> CO <sub>2</sub> | V <sub>2</sub> NO <sub>2</sub> | V <sub>2</sub> NO <sub>2</sub> | Nb <sub>2</sub> CO <sub>2</sub> | Nb <sub>2</sub> CO <sub>2</sub> |
| a <sub>h</sub> (Å) | 9.938                          | 9.893                          | 9.902                           | 9.852                           | 9.928                          | 9.917                          | 9.378                           | 9.421                           |
| b <sub>h</sub> (Å) | 5.732                          | 5.714                          | 5.713                           | 5.731                           | 5.735                          | 5.722                          | 5.427                           | 5.433                           |

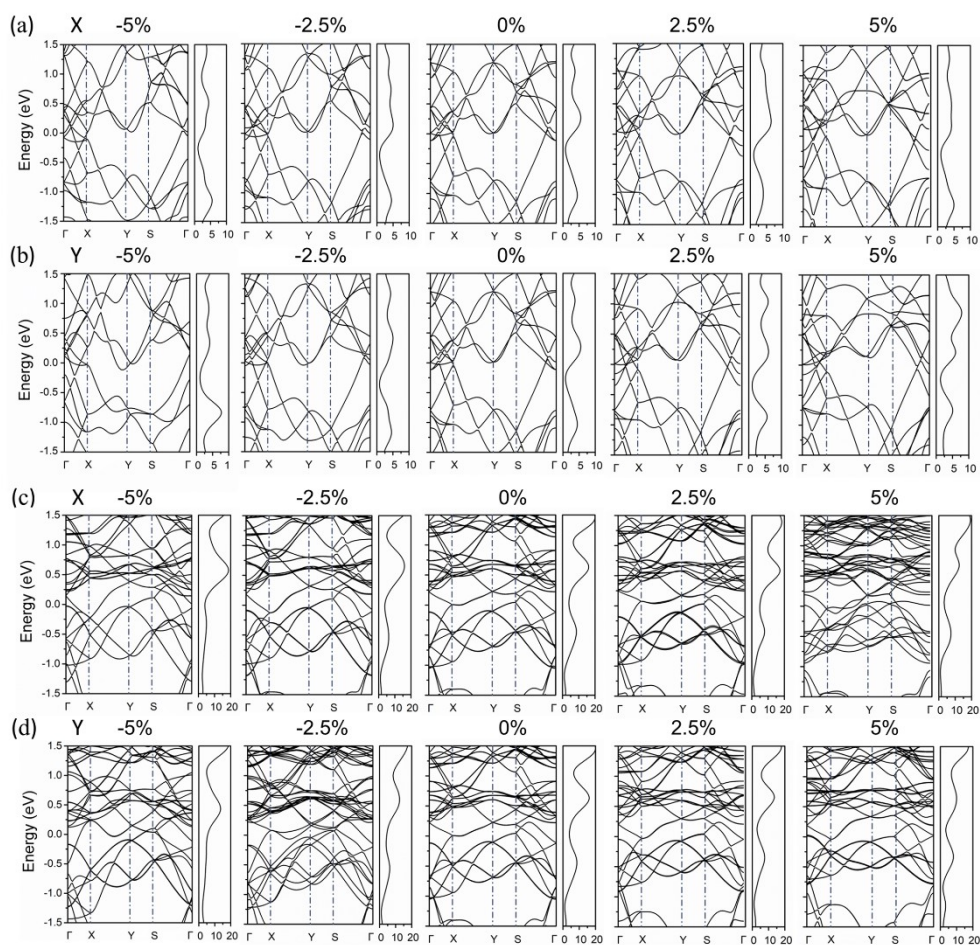

**Figure S1.** Electronic structures under different tensile strains. 1T-MoS<sub>2</sub>: (a) and (b); V<sub>2</sub>CO<sub>2</sub>: (c) and (d).

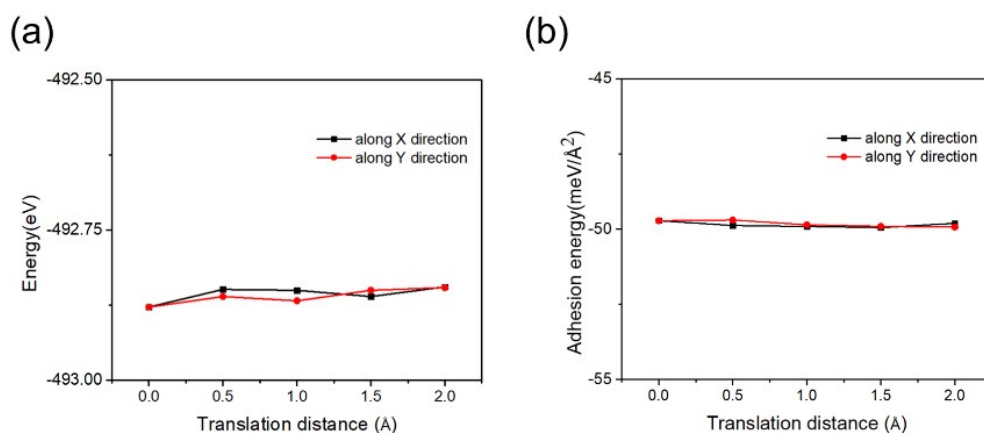

**Figure S2.** During the slipping process, (a) changes in the energy of the heterostructure system, and (b) changes in the interlayer binding energy of the heterostructure.

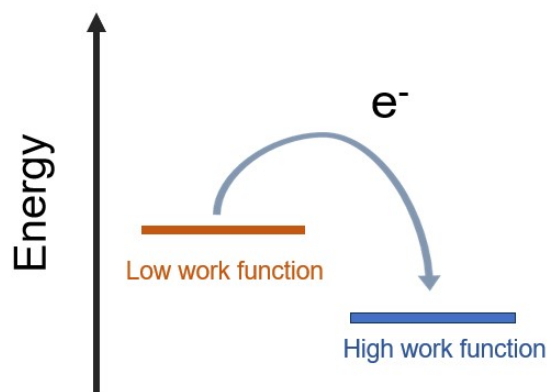

**Figure S3.** Schematic diagram of electron injection in the heterostructure

**Table S2.** Work Functions of MoS<sub>2</sub> and metallic MXenes with M<sub>2</sub>XT<sub>2</sub> composition

|                                 | Work Function (eV) |
|---------------------------------|--------------------|
| 1T-MoS <sub>2</sub>             | 5.060              |
| 2H-MoS <sub>2</sub>             | 5.712              |
| V <sub>2</sub> CO <sub>2</sub>  | 6.695              |
| Nb <sub>2</sub> CO <sub>2</sub> | 5.820              |
| Ta <sub>2</sub> CO <sub>2</sub> | 5.413              |
| Cr <sub>2</sub> CO <sub>2</sub> | 8.010              |
| Mo <sub>2</sub> CO <sub>2</sub> | 7.402              |
| Ti <sub>2</sub> NO <sub>2</sub> | 5.989              |
| V <sub>2</sub> NO <sub>2</sub>  | 6.135              |

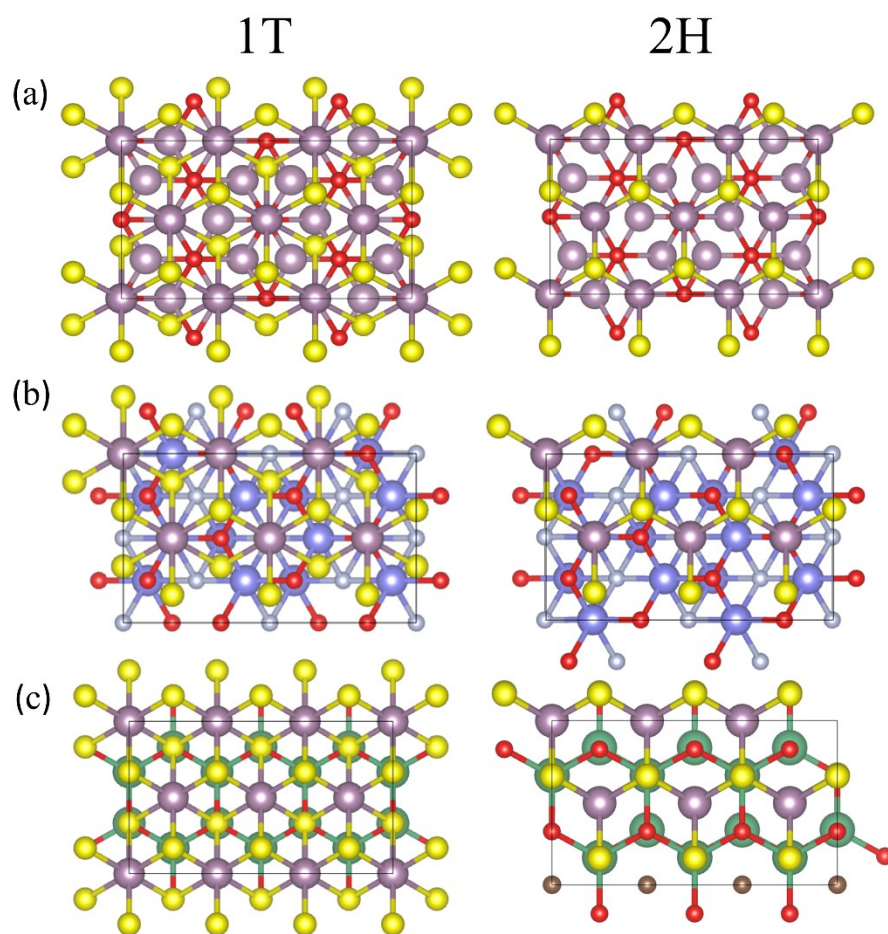

**Figure S4.** Top view of (a)  $\text{MoS}_2\text{-Mo}_2\text{CO}_2$ , (b)  $\text{MoS}_2\text{-V}_2\text{NO}_2$ , and (c)  $\text{MoS}_2\text{-Nb}_2\text{CO}_2$ . Color code: S, yellow; Mo, purple; Nb, green; O, red; V, blue; C, brown; and N, grey.

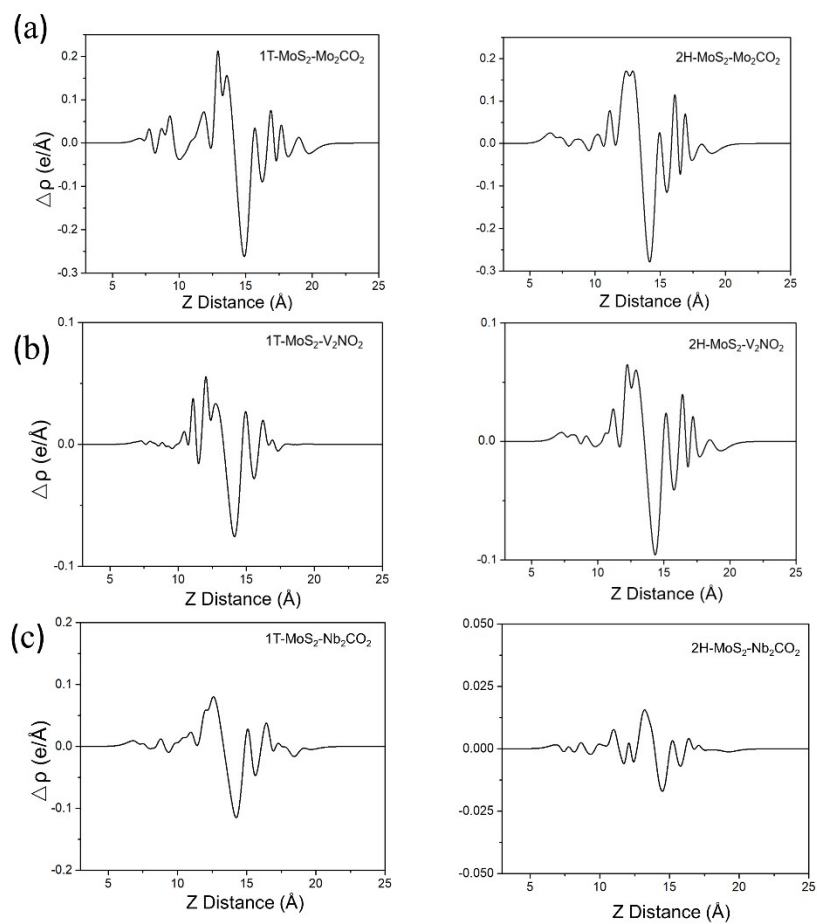

**Figure S5.** Heterostructures plane-averaged charge density difference (a) MoS<sub>2</sub>-Mo<sub>2</sub>CO<sub>2</sub>, (b) MoS<sub>2</sub>-V<sub>2</sub>NO<sub>2</sub>, and (c) MoS<sub>2</sub>-Nb<sub>2</sub>CO<sub>2</sub>

**Table S3.** Electron change of MoS<sub>2</sub> in different heterostructures

|                                         | 1T-MoS <sub>2</sub> -           | 2H-MoS <sub>2</sub> -           | 1T-MoS <sub>2</sub> -          | 2H-MoS <sub>2</sub> -          | 1T-MoS <sub>2</sub> -           | 2H-MoS <sub>2</sub> -           |
|-----------------------------------------|---------------------------------|---------------------------------|--------------------------------|--------------------------------|---------------------------------|---------------------------------|
|                                         | Mo <sub>2</sub> CO <sub>2</sub> | Mo <sub>2</sub> CO <sub>2</sub> | V <sub>2</sub> NO <sub>2</sub> | V <sub>2</sub> NO <sub>2</sub> | Nb <sub>2</sub> CO <sub>2</sub> | Nb <sub>2</sub> CO <sub>2</sub> |
| Electron change of MoS <sub>2</sub> (e) | -0.271                          | -0.295                          | -0.061                         | -0.099                         | -0.121                          | -0.015                          |

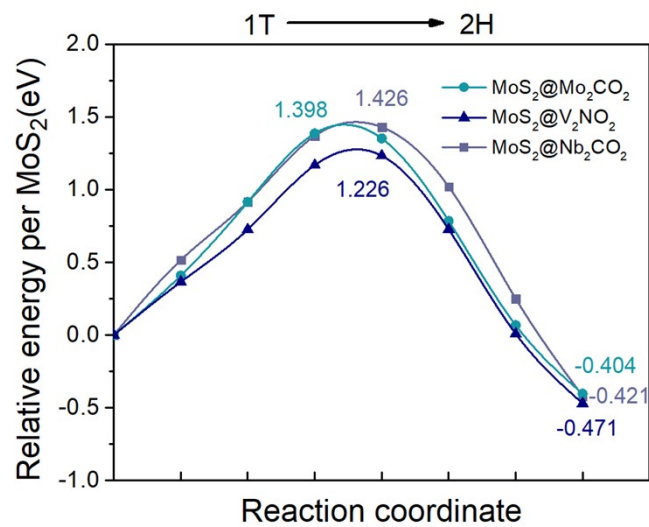

**Figure S6.** Phase transition energy barrier of MoS<sub>2</sub> from 1T phase to 2H phase

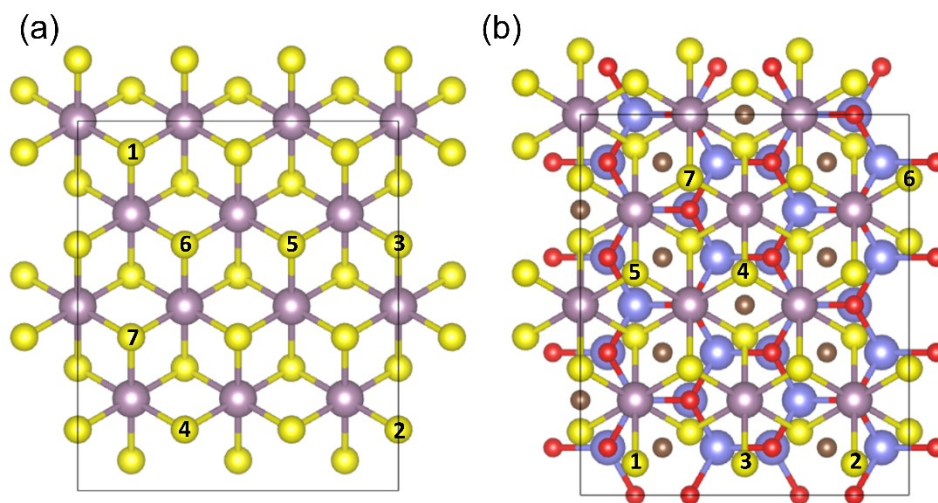

**Figure S7.** Hydrogen adsorption sequence (a) monolayer 1T-MoS<sub>2</sub> and (b) 1T-MoS<sub>2</sub>-V<sub>2</sub>CO<sub>2</sub>

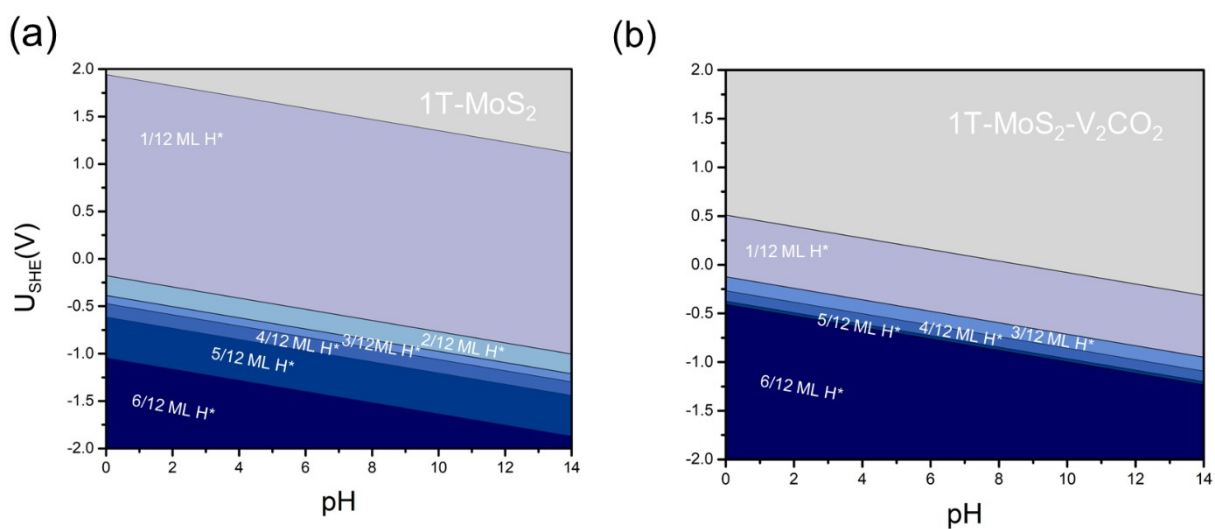

**Figure S8.** Pourbaix diagram of 1T-MoS<sub>2</sub> under HER conditions (a) monolayer 1T-MoS<sub>2</sub> and (b) 1T-MoS<sub>2</sub>-V<sub>2</sub>CO<sub>2</sub>

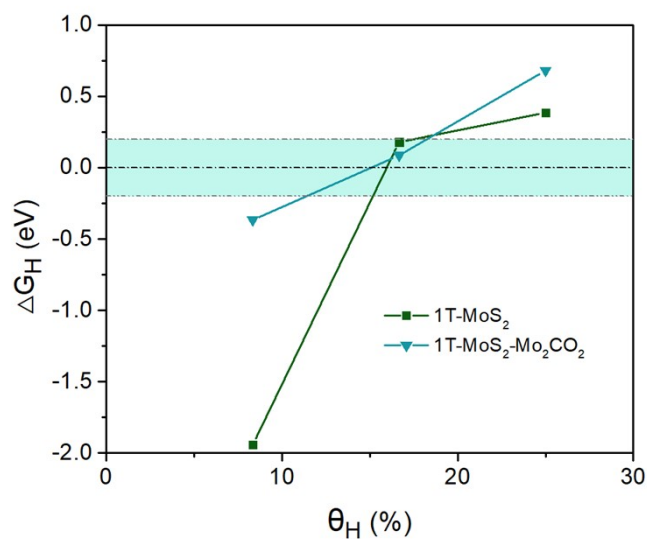

**Figure S9.** The hydrogen adsorption free energy at different active sites on the basal plane of 1T-MoS<sub>2</sub>-Mo<sub>2</sub>CO<sub>2</sub> as a function of hydrogen coverage was investigated using structures of the same size as shown in Figure S4. The optimal  $\Delta G_H$  of 0.086 eV was achieved at a hydrogen coverage of 16.67%.
